# Supplementary material
Source: PubMed Central journal article supplement (PMC5013912)
Supplement: supp_btw425_160328_PHARAOH_SuppFig.pdf [file supp_btw425_160328_PHARAOH_SuppFig.pdf]

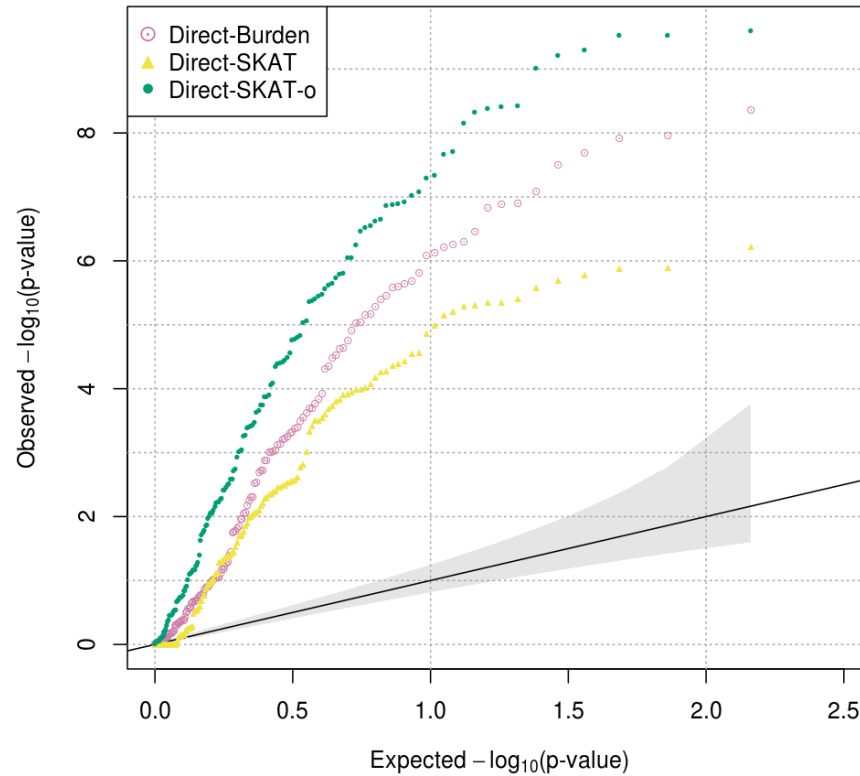

**Supplementary Fig. 1** Quantile-quantile plot of GAW17 simulation dataset analysis result using Direct Region-Based (DRB) method. Three types of DRB tests (Direct-Burden, Direct-SKAT and Direct-SKAT-o) are plotted with green, pink and yellow dots, respectively.
